# Supplementary material
Source: publisher figshare collection journal article supplement (https://gsapubs.figshare.com/ndownloader/files/23307836)
Supplement: Supplementary file 1 [file 23307836]

## Sheet: U Th Pb data
run order	Sample_Grain_position (r = rim, m = mantle, c = core)	Duration(s)	Approx_Pb_PPM	Approx_U_PPM	Approx_Th_PPM	Th/U	Final207_206	2 se %	Final207_235	2 se %	Final206_238	2 se %	Rho	FinalAge207_206		FinalAge207_235		FinalAge206_238		% Discordance	207Pb corr'd 206/238 Age (Ma)	2 SE abs.		P31_CPS	Ti_ppm_m49	Ti_ppm_m49_Int2SE	Y_ppm_m89	Nb_ppm_m93	La_ppm_m139	Ce_ppm_m140	Pr_ppm_m141	Nd_ppm_m146	Sm_ppm_m147	Eu_ppm_m153	Gd_ppm_m157	Tb_ppm_m159	Dy_ppm_m163	Ho_ppm_m165	Er_ppm_m166	Tm_ppm_m169	Yb_ppm_m172	Lu_ppm_m175	Hf_ppm_m178
1	Braden_001_r	4.4488	35.2	1016	44.7	0.0421941	0.1159	1.70464	1.152	7.44593	0.0728	7.24296	0.973442	1893	30.6616	776	57.7804	453	32.8106	76.0697	420.18	29.7677		4460	20	11	1980	1.74	0.014	1.65	0.043	1.49	2.32	0.62	22.2	8.5	135	69.4	352	93.1	1020	179	13000
2	Braden_001_c	11.075	63.2	221.1	82.6	0.372578	0.11372	1.31437	4.894	2.18359	0.3151	2.60906	0.864271	1859	23.7393	1800	39.3047	1765	46.05	5.05648	1754.39	44.8204		4690	9.8	2	1765	1.45	0.009	3.34	0.077	0.85	3.42	0.26	25.3	11.32	146.4	59	275.3	61.2	545	101.3	12060
3	Braden_002_r	2.0112	14.5	1210	13.4	0.00990099	0.11	10.0499	0.154	16.9127	0.0104	18.3086	0.840058	1790	182.853	145	24.5234	67	12.2668	96.257	61.4409	11.2445		3050	6.7	3.2	1250	1.84	0.025	0.96	0.038	0.83	1.67	0.51	12.3	5.15	84	33.6	206	61.2	809	180	13970
4	Braden_002_c	40.459	42.45	157.4	51.1	0.327225	0.11581	1.09618	5.257	1.69582	0.332	1.72194	0.794369	1892	19.7205	1860	31.5423	1849	31.8387	2.27273	1842.21	31.271		5240	10.1	2.2	2223	1.21	0.0132	0.73	0.057	1.41	4.68	0.116	37.2	14.04	186	74.6	340	70.6	653	118.2	11190
5	Braden_003_r	4.4758	41.6	1171	71	0.0578035	0.1094	3.17789	0.924	9.57617	0.0622	7.33357	0.963905	1787	57.8912	662	63.3942	389	28.5276	78.2317	362.964	26.146		4430	12.5	2	1580	1.91	0.074	5.1	0.334	2.61	6.9	6.03	35	11.2	139	52.4	266	59.5	695	122	13130
6	Braden_003_c	46.734	116.8	387.5	203.2	0.532198	0.1125	1.05551	3.746	1.52238	0.2446	1.63048	0.777939	1840.4	19.109	1581	24.0689	1410	22.9898	23.3862	1373.64	21.6711		3610	10.6	2.6	2129	1.53	0.0167	7.35	0.091	2.46	7.6	0.65	48.9	17.1	196.9	76	323	67.2	573	104.8	11680
7	Braden_004_r	5.1151	9.7	1430	20.6	0.0140056	0.102	2.28883	0.1048	4.4088	0.00759	3.75426	0.854688	1660	42.3742	101.1	4.4573	48.8	1.83208	97.0602	45.3649	1.70447		2230	4.6	1.6	846	1.6	0.026	0.75	0.037	0.57	0.53	0.2	1.51	1.95	35.6	23.3	175	63.6	789	159	13100
8	Braden_004_c	35.126	88	389.6	143.4	0.369686	0.11413	1.0953	2.918	1.98396	0.1867	1.92073	0.843113	1866.8	19.7671	1386	27.4977	1103	21.1856	40.9149	1055.63	19.566		1310	7.8	2	851	1.749	0.0158	10.78	0.057	0.97	2.12	0.326	13.8	5.57	74.4	29.4	140.9	32.1	298	58.1	11880
9	Braden_005_r	2.5665	9.8	950	11.9	0.0117647	0.1071	4.1376	0.181	12.1958	0.0124	12.1561	0.942267	1749	75.7375	169	20.6108	79.3	9.63983	95.466	73.5068	8.90686		3080	3.1	2.9	841	1.57	0.0086	0.79	0.022	0.3	1.28	0.17	5	2.32	47	23.7	171	54.8	726	138	12600
10	Braden_005_c	9.5798	68.3	232.6	89.1	0.387297	0.1133	1.45663	5.048	1.92443	0.3246	2.22969	0.763618	1852	26.33	1827	35.1594	1819	40.5581	1.78186	1807.01	39.6378		4010	12.9	1.8	1674	1.5	0.0013	1.67	0.089	1.32	3.84	bdl	28.4	10.44	141.3	54.2	246	49.4	458	82.1	12610
11	Braden_006_c	21.466	76.6	262.8	105.4	0.407332	0.11426	1.09156	4.959	1.6809	0.3171	1.74104	0.797049	1867.9	19.6946	1812	30.4579	1775	30.9034	4.9735	1764.2	30.1304		4930	8.5	1.9	2066	1.317	0.011	1.54	0.073	1.43	4.24	0.169	36.6	14.98	177.9	69.6	326.6	64.7	562	102.5	11820
12	Braden_007_c	33.352	42.8	71.01	36.5	0.503018	0.21582	1.06649	16.23	1.44815	0.5507	1.58471	0.756253	2950.2	17.2176	2892.3	41.8848	2827	44.7999	4.17599	2770.36	52.7458		800	5.1	2.6	251.3	1.273	0.0031	12.58	0.0063	0.33	0.87	0.345	4.78	1.53	20	7.77	38.5	9.13	91.8	19.21	10400
13	Braden_008_r	4.6125	1.93	900	10.5	0.00990099	0.09	7.4012	0.0384	11.7613	0.00301	7.40682	0.794431	1460	141.349	38.2	4.49283	19.4	1.43692	98.6712	18.3073	1.3643		3200	bdl	5.3	1420	1.84	0.07	2.8	0.69	12.8	21.3	16.1	89	21	124	39.5	218	66.3	800	169	14900
14	Braden_008_c	4.2577	52.3	180.9	61.8	0.33557	0.1147	2.31909	3.82	5.58759	0.242	5.5043	0.912679	1874	41.8079	1610	89.9603	1399	77.0052	25.3469	1356.04	72.0415		3340	14.4	3.9	1382	1.19	0.0146	2.41	0.042	1.62	3.2	0.24	23.4	7.35	106.4	43.3	215	50.2	468	91.1	11770
15	Braden_009_c	7.1423	52.1	268.2	74.9	0.278552	0.1135	1.39258	4.17	2.59823	0.2659	2.75699	0.866397	1856	25.1625	1667	43.3125	1519	41.8787	18.1573	1487.64	39.7325		3320	14	4.3	1487	1.34	0.036	1.95	0.076	1.52	3.57	0.294	30.3	11.62	130.4	51.8	219	48.8	437	85	12740
16	Braden_010_r	1.2922	1.7	1669	5.1	0.00263158	0.073	19.2041	0.0138	18.8671	0.001387	1.76754	-0.145542	980	389.177	14	2.64139	8.94	0.158018	99.0878	8.63216	0.219942		2790	3.8	4	807	1.67	0.018	1.26	0.041	0.47	0.99	0.24	3.7	1.83	32.1	22.7	179	56.6	804	159	13540
17	Braden_010_c	10.966	91.55	148.2	124.5	0.841043	0.1844	1.16441	9.29	1.89923	0.3649	1.70117	0.796246	2693	19.2383	2366	44.9357	2005	34.1084	25.5477	1867.78	31.9566		1420	9.9	3.4	835	1.7	0.0075	14.49	0.071	1.23	3.29	0.42	18.6	6.37	68.3	28.1	125.6	25.11	222	42.2	9740
18	Braden_011_outer r	3.1981	0.241	1745	3.7	0.00243902	0.0589	10.7427	0.0065	6.69054	0.000846	6.14664	-0.399543	530	234.026	6.57	0.439568	5.45	0.334992	98.9717	5.36337	0.332449		2220	5.8	9.5	712	1.42	0.019	0.24	0.034	bdl	0.31	0.12	0.79	1.14	24.7	20.4	168	55.8	930	218	13000
19	Braden_011_inner r	7.7083	0.062	2020	3	0.003125	0.0474	8.07901	0.00807	6.88834	0.001245	4.11462	-0.0157191	120	192.204	8.17	0.562777	8.02	0.329992	93.3167	8.00858	0.331667		2920	bdl	5	975	1.75	0.0046	0.125	0.02	0.16	0.25	bdl	4	1.42	39.2	26.3	209	74	905	194	13300
20	Braden_011_c	18.793	104.3	168.6	133.8	0.798085	0.11409	1.15527	5.096	1.86131	0.3238	2.05456	0.83038	1865	20.851	1834	34.1363	1807	37.1259	3.10992	1801.04	36.3462		3580	6.6	2.1	1781	1.244	0.011	6.22	0.088	2.41	6.32	0.76	38.5	14.89	163	63	269	55.5	476	89.5	11200
21	Braden_012_r	14.47	0.069	1340	2.7	0.0037037	0.0505	5.43925	0.00853	6.17761	0.001214	2.45495	0.481486	200	125.897	8.62	0.53251	7.82	0.191977	96.09	7.77857	0.192806		2440	1.2	3	780	1.72	0.0037	0.148	0.0083	0.22	0.14	bdl	1.09	1.32	30.9	20.9	174.8	57	840	168.7	14740
22	Braden_013_r	13.155	0.046	1430	2.5	0.002	0.0518	6.83036	0.00861	6.81017	0.001196	4.18894	0.302725	250	156.431	8.71	0.593166	7.71	0.322967	96.916	7.65061	0.322199		1750	2	5.5	598	1.51	bdl	bdl	0.022	0.16	bdl	bdl	0.49	0.95	16.3	14.7	133	56.9	794	176	12890
23	Braden_013_c	12.027	119.3	207.2	158.1	0.762777	0.11373	1.18355	4.876	2.20823	0.3097	2.25151	0.859316	1860	21.3761	1797	39.6819	1739	39.1537	6.50538	1724.99	37.981		1270	6.6	2.4	1325	1.28	bdl	9.93	0.109	2.71	5.84	0.69	32.1	10.4	123.9	44.3	201	39.3	320	60	10200
24	Braden_014_c	22.363	43.9	332	63.8	0.188679	0.11475	1.12048	4.868	2.04793	0.3097	1.98577	0.846115	1875.6	20.1978	1797	36.8013	1739	34.5325	7.283	1723	33.4727		3860	5.8	2.7	1357	1.29	0.0151	1.12	0.056	0.86	2.96	0.42	21.9	8.41	115.8	45.6	208.7	43.6	403	73.8	12170
25	Braden_015_r	2.2274	3.7	703	19	-1	0.161	21.1417	0.0432	20.1637	0.00199	18.1302	0.394326	2410	357.083	42.9	8.65023	12.8	2.32067	99.4689	10.9562	2.06008		1580	2.5	4.6	923	1.82	0.013	3.45	0.075	0.21	1.94	0.32	6	1.86	47.1	28	186	62.2	765	154	13440
26	Braden_015_c	16.537	100.2	148.3	95.5	0.651042	0.1511	1.14414	8.61	2.42274	0.4124	2.38499	0.886849	2358	19.5389	2299	55.6989	2231	53.209	5.38592	2197.23	53.7296		1300	3.4	2.3	1442	1.51	0.0125	8.29	0.154	3.88	8.32	0.92	41.7	12.03	136.7	50	214.8	41.3	335	59.3	9450
27	Braden_016_r	3.4811	15.8	1265	24	0.0153846	0.1232	4.33762	0.554	15.3755	0.0324	12.4039	0.973824	1999	77.0255	445	68.421	206	25.552	89.6948	186.953	22.967		2120	1.7	4.1	812	1.81	0.045	0.84	0.14	1	1.4	0.14	10	3	55	29	178	51.2	700	138	14000
28	Braden_016_c	26.916	72.8	155	77.6	0.498256	0.11554	1.11127	5.13	2.54397	0.3224	2.67286	0.910414	1887.8	20.002	1844	46.9108	1799	48.0847	4.70389	1790.47	46.9262		3410	20.3	3.4	1877	1.18	0.0065	2.38	0.143	2.94	8.6	0.299	53.4	17.4	186	65.8	276	48.5	458	77.7	10980
29	Braden_017_c	18.158	40.54	218.5	52.5	0.239578	0.11377	1.17875	4.856	2.10595	0.3089	2.06732	0.840598	1860	21.2878	1796	37.8228	1735	35.868	6.72043	1720.56	34.7915		2740	7.6	3.1	850	1.13	0.013	0.86	0.06	1.25	5.67	0.38	33.4	9.25	93.4	26.8	103.6	19	158.5	29.6	12400
30	Braden_018_outer_c	17.03	166.1	631	345	0.553403	0.11055	1.15549	2.703	2.40092	0.1783	2.49487	0.889288	1808	21.0002	1328	31.8843	1057	26.3708	41.5376	1013.95	24.3926		2020	14.3	2.6	1509	1.62	0.036	17.01	0.16	2.84	7.34	1.09	37.5	11.89	130.7	50.9	226.4	47.9	486	78.5	10930
31	Braden_018_inner_c	29.052	109.9	405.9	235.9	0.572738	0.11318	1.08622	3.362	1.487	0.216	1.57397	0.749562	1851.8	19.6389	1497.4	22.2664	1261	19.8478	31.9041	1216.97	18.5098		1410	1540	130	1056	6.72	0.038	12.79	0.077	1.68	3.25	0.55	17.8	6.61	94.2	32.5	162.6	34.8	325	60.7	10720
32	Braden_019_r	3.6101	4.45	1040	13.4	0.012987	0.1013	5.90951	0.0507	8.34416	0.00365	6.68395	0.711629	1640	109.584	50.2	4.18877	23.5	1.57073	98.5671	21.8604	1.46996		2640	8.2	4.4	837	1.49	0.019	0.78	0.094	0.86	1.45	0.59	8	3.14	44.9	24	182	58.1	833	141.3	13150
33	Braden_019_c	26.062	44.3	178.1	71.7	0.40032	0.11383	1.13871	4.71	1.63625	0.2997	1.62863	0.75672	1861	20.5624	1768	28.929	1692	27.5564	9.08114	1670.45	26.5882		3170	13.2	2.9	1037	1.11	0.0088	1.35	0.068	1.15	4.38	0.64	31	9.86	99.1	34.9	130.6	23.7	187.5	32.5	11830
34	Braden_020_c	15.594	95.9	361.8	176.4	0.483092	0.11336	1.17529	4.001	2.5304	0.2565	2.32236	0.886154	1854	21.2421	1633	41.3214	1471	34.1619	20.658	1436.87	32.2842		5670	21.6	7.2	2641	1.31	0.0288	2.4	0.102	2.79	5.83	0.56	41.5	18.1	223	88.1	399	82	719	131.7	11260
35	Braden_021_r	1.443	8	1830	16.8	0.00694444	0.113	13.3119	0.0388	21.1577	0.00251	24.3324	0.837681	1840	240.766	38.6	8.16686	16.2	3.94185	99.1196	14.7985	3.61056		2110	7.6	4.2	1230	1.8	0.019	0.52	0.065	0.36	2	1.08	16.6	5.2	77	36.9	244	71	990	184	13900
36	Braden_021_m	11.592	105.9	554	209.5	0.37037	0.11044	1.24551	2.18	2.71389	0.1437	2.52961	0.88949	1806	22.6412	1173	31.8339	866	21.9064	52.0487	822.605	20.1275		3420	52	13	1500	3.2	0.041	5.2	0.261	3.45	9.7	4.52	44.8	13.3	150	49.5	221	46.5	489	90.3	14990
37	Braden_021_c	7.2631	209	458	528	1.17786	0.1348	1.38926	3.339	3.01578	0.1798	2.97775	0.89262	2161	24.2317	1489	44.905	1066	31.7428	50.671	992.457	28.4971		2800	33	9.2	1960	3.19	0.098	49.9	0.349	8.2	18.1	5.88	75.6	22.4	203.4	63	265	47	440	83	11060
38	Braden_022_c	14.099	27.2	79.3	84.5	1.02775	0.1115	1.46911	3.178	2.5631	0.2056	2.04321	0.819743	1823	26.6493	1457	37.3444	1205	24.6207	33.9002	1162.54	22.9561		370	14.7	7.8	1650	1.5	0.057	12.3	0.19	2.49	4.1	1.61	34.3	10.3	133	51.4	248	45.6	410	92.8	11160
39	Braden_023_c	8.4112	50.4	518	109	0.207125	0.1627	1.44629	3.77	3.59035	0.168	3.88067	0.92796	2483	24.3844	1585	56.907	1009	39.156	59.3637	896.801	33.527		1200	15.1	3.1	770	2.52	0.07	5.97	0.209	2.49	3.45	3.23	17.6	5.29	67.3	24.5	124.5	32.1	322	61.9	11980
40	Braden_024_r	5.3831	45.9	917	80	0.0806452	0.1114	2.45688	0.384	14.8774	0.025	14.0513	0.987195	1821	44.5762	328	48.7979	159	22.3416	91.2685	146.852	20.4616		2730	9.9	6.2	1960	2.92	0.09	5.9	0.243	3.8	12.6	6.2	49	15.8	188	66.1	342	83.4	885	174	14330
41	Braden_024_c	13.794	74.5	484	161.9	0.33456	0.11411	1.26283	1.7	4.12311	0.1077	3.99152	0.952076	1865	22.7913	1006	41.4784	659	26.3041	64.6649	618.255	23.9677		2410	9.8	2.3	1860	2.97	0.037	6.33	0.175	4.4	15.2	8	67	19.3	197	64.1	266	56.5	600	103	12380
42	Braden_025_r	8.3312	0.787	1736	2.5	0.003125	0.0612	7.42063	0.01116	6.0863	0.001341	4.05914	-0.0312919	610	159.428	11.27	0.685926	8.64	0.350709	98.5836	8.47498	0.347414		2630	1.2	1.7	888	1.36	0.005	0.23	0.025	bdl	0.24	0.113	1.64	1.28	34.7	23.5	184	67.8	926	191	13320
43	Braden_025_c	16.149	117.4	181.9	156.4	0.85034	0.11646	1.1096	4.73	2.09359	0.295	2.13241	0.862275	1902.4	19.938	1771	37.0774	1666	35.5259	12.4264	1640.01	34.0738		73400	10.6	1.8	1299	2.84	1	34.2	3.24	35.5	19.7	1.46	52	13.4	139.6	44.9	198.7	36	314	55.3	10950
44	Braden_026_m	21.149	24.86	579	96.5	0.163934	0.1043	1.16334	1.533	1.96888	0.1068	1.84732	0.815985	1701	21.425	945	18.6059	653.9	12.0796	61.5579	620.837	11.1718		2660	19.8	3.4	1339	1.34	0.096	4.43	0.38	2.73	5.4	4.59	17	6.96	95.4	39.3	209	51.3	572	133.3	14190
45	Braden_026_c	8.9719	22.63	337.7	130	0.378788	0.10605	1.26407	1.972	2.44508	0.1347	2.46478	0.867464	1736	23.1907	1105	27.0181	814	20.0633	53.1106	776.66	18.5416		2180	44	17	1335	1.53	0.073	4.43	0.253	3.19	4.8	4.34	19.4	7.8	99	40	215.8	48.9	477	119	13860
46	Braden_027_r	3.6315	0.94	190	27.7	0.149254	0.121	13.2609	0.0459	12.6757	0.002811	3.51933	-0.0313052	2020	236.361	45.5	5.76743	18.09	0.636648	99.1045	16.3888	0.683129		11800	6.8	8.3	26000	1.49	0.2	8.1	2.41	63.7	304	750	1950	519	4140	820	2320	365	2520	451	14280
47	Braden_027_c	3.9252	22.2	64.2	45.2	0.727802	0.1108	2.55076	3.33	4.61417	0.218	3.73039	0.833688	1812	46.335	1488	68.6588	1271	47.4132	29.8565	1231.3	44.3814		800	14.1	8.4	3580	2.48	0.13	13.1	0.61	11.9	36	45.7	177	49.1	429	125	423	80.5	717	148	11240
48	Braden_028_r	2.243	21.6	1840	128	0.0537634	0.0972	2.9523	0.244	6.63319	0.0206	21.3929	1.73689	1569	55.2961	247	16.384	131	28.0247	91.6507	123.476	26.2311		3050	18.7	3	1280	2.04	0.19	9.1	1.05	9.3	10	14.6	27.8	10.4	101	40.9	228	59.1	861	149	13400
49	Braden_028_c	13.009	43.6	183.9	77.9	0.41841	0.11044	1.29	3.195	2.75445	0.2098	2.6258	0.886103	1806	23.45	1454	40.0496	1227	32.2186	32.0598	1186.98	30.0472		1240	6.4	2.1	670	2.25	0.036	5.72	0.128	1.45	2.83	0.72	15.1	4.58	57.8	23.1	101.5	22.9	236	42.7	10790
50	Braden_029_r	2.6916	12.7	965	11.5	0.0107527	0.1116	2.9523	0.24	9.63537	0.0157	9.62921	0.953029	1825	53.5434	218	21.0051	100.6	9.68698	94.4877	92.4208	8.85882		1800	0.5	3.9	850	1.7	0.02	0.49	0.065	0.53	0.56	0.34	4.3	2.6	41.3	28	148	56.7	733	158	13800
51	Braden_029_c	13.794	113	307.9	150.6	0.488998	0.11392	1.16913	4.913	2.23134	0.3111	2.1902	0.860329	1863	21.1079	1803	40.231	1746	38.2409	6.28019	1732.23	37.1192		5670	6.2	1.4	2399	1.28	0.0097	3.83	0.081	2.29	7.44	0.34	46.6	16.37	208	76.8	360	72.6	640	115.3	11840
52	Braden_030_r	0.99534	5.54	940	22.4	0.0232558	0.107	29.9233	0.049	30.6286	0.003294	1.26323	0.572537	1730	547.853	48	14.7017	21.202	0.26783	98.7745	19.5775	0.892523		2760	3.4	1.6	879	1.61	0.0081	2.14	0.038	1.02	1.09	0.33	7.9	3.58	52	25.6	182	56.4	705	141.6	12900
53	Braden_030_c	5.1269	152.3	270.7	200.3	0.74239	0.1136	1.4546	4.52	3.67836	0.2869	3.55478	0.919677	1857	26.278	1733	63.746	1626	57.8008	12.4394	1601.39	55.3138		1610	12	2.5	1246	1.81	0.0058	6.68	0.061	2.42	4.04	0.244	29.4	10.1	119.8	41.8	179	36.1	325	62.6	10660
54	Braden_031_r	0.99257	2.591	1460	31	0.0204082	0.1056	9.05162	0.0393	7.44659	0.002693	2.02719	-0.740963	1720	166.224	39.2	2.91906	17.33	0.351313	98.9924	16.0388	0.386507		2790	3.4	4.5	832	1.65	0.03	2.7	0.089	1.29	1.6	0.62	4.5	2.3	42	26.5	166	61.7	819	174.9	12400
55	Braden_031_m	5.3363	198.5	494	282	0.569152	0.16266	1.15497	6	3.00463	0.2665	3.40777	0.942796	2483.4	19.4736	1974	59.3113	1535	52.3092	38.1896	1406.93	46.3615		2460	8.2	1.2	1392	2.55	0.084	37.5	0.226	3.73	7.91	2.24	30.3	10.46	113.8	41.9	208	45.5	449	90.6	10540
56	Braden_031_c	12.613	213.6	184.5	257.5	1.4039	0.1638	1.20457	8.37	1.74799	0.3688	1.93537	0.790738	2495	20.2859	2272	39.7144	2023	39.1525	18.9178	1934.41	37.5693		1850	4.8	2	1543	1.88	0.0226	53.7	0.381	7.5	11.9	3.06	53	14.24	145	48.2	223	40.6	366	71.3	10010
57	Braden_032_r	2.2308	38.7	738	41.5	0.0561798	0.1197	2.93265	1.76	13.673	0.106	11.3842	0.989201	1950	52.3896	1028	140.558	650	73.9972	66.6667	604.401	66.8108		3410	9	2.4	1740	1.76	0.038	1.47	0.105	1.95	4.85	0.82	37.3	14.8	167	55.1	261	48.4	496	89.5	12400
58	Braden_032_c	13.831	82.4	465	180	0.374532	0.1153	1.50706	3.15	4.24641	0.1973	3.74534	0.93649	1884	27.1382	1441	61.1908	1160	43.4459	38.4289	1112.06	40.1181		4730	16.5	2.2	3520	1.86	0.045	4.49	0.403	7.8	13.6	2.9	97.2	28.1	350	123	531	98.2	947	148	11370
59	Braden_033_c	10.293	29.51	243.3	49.7	0.200401	0.11362	1.21797	3.959	2.46043	0.2514	2.56528	0.883355	1858	22.0023	1634	40.2034	1445	37.0683	22.2282	1408.77	34.9319		2140	7.1	2.2	984	1.34	0.024	0.87	0.045	0.72	2.95	0.27	22.9	7.7	100.5	32	145.1	27.1	255	51.1	12640
60	Braden_034_c	13.33	78.9	569	223	0.3125	0.10781	1.20768	2.121	2.38823	0.1415	2.43619	0.874859	1762	22.073	1155	27.5841	853	20.7807	51.5891	812.983	19.1635		5940	10.3	2.3	2550	2.17	0.107	5.18	0.325	3.14	6.9	2.29	34.9	14.8	194	80.3	393	100.1	988	190	14110
61	Braden_035_r	6.6288	0.324	795	0.8	0.00769231	0.0567	14.3207	0.0116	24.1586	0.00137	18.2876	0.806914	400	316.448	11.7	2.82656	8.8	1.60931	97.8	8.70842	1.59439		1810	4.3	3.4	900	1.77	0.019	0.54	0.091	1.32	2.61	1.18	9.1	3.41	49.4	25.8	182	59	855	164.3	13800
62	Braden_035_c	10.799	64.2	345	64.2	0.181159	0.1163	1.91546	1.97	7.17661	0.1245	6.85287	0.963764	1899	34.4283	1099	78.871	755	51.7392	60.2422	710.237	47.1252		1840	11	3	938	1.4	0.0042	1.79	0.095	1.12	1.83	0.168	13.4	6.23	76.9	33.4	151	35.7	387	71.3	11780
63	Braden_036_r	10.101	95.9	317.8	124	0.392619	0.11483	1.31467	4.23	3.6844	0.2658	3.59236	0.935029	1877	23.6946	1678	61.8243	1518	54.532	19.1263	1484.82	51.6146		1000	7.3	1.6	443	1.53	0.012	13.4	0.105	1.73	2.44	0.64	13.6	3.87	39.2	13.6	67.3	14.6	143	23.2	10420
64	Braden_037_r	1.3127	0.62	1030	5.3	0.0005	0.0644	13.5463	0.0193	25.4083	0.00215	14.4685	0.913196	740	285.905	19.4	4.92921	13.8	1.99665	98.1351	13.5282	1.96181		1690	2.5	4.4	1040	1.63	0.018	0.61	0.065	0.42	1.5	0.46	9.6	5.1	81	33.4	174	51.7	620	138	14100
65	Braden_037_c	18.308	83.5	340.6	109.2	0.315457	0.11675	1.19321	4.28	3.42047	0.2644	3.36072	0.938227	1906	21.4289	1691	57.8402	1518	51.0158	20.3568	1474	47.9211		1540	11.1	2.8	1860	1.96	0.043	18.3	0.129	4.02	8	0.99	35	13.3	169	62.8	284	58	545	93	11670
66	Braden_038_r	4.1498	3.3	1177	5.8	0.000625	0.123	24.4107	0.028	29.6597	0.00165	18.2214	0.569751	1880	433.619	28	8.30472	10.6	1.93147	99.4362	9.59585	1.79344		1910	23	17	887	1.92	0.064	0.71	0.095	0.45	0.86	0.23	4.4	1.63	42.7	26.5	205	72.6	959	197	14780
67	Braden_038_c	17.045	68.3	261.9	78.2	0.301205	0.11419	1.10618	4.85	2.66867	0.3061	2.69895	0.91512	1868.4	19.9611	1792	47.8226	1720	46.422	7.94262	1704.52	44.9015		4130	7.3	2.2	1832	1.3	0.0055	2.25	0.044	1.16	4.68	0.272	30.8	11.5	149.6	58.7	280	57	579	97.9	11980
68	Braden_039_r	2.6496	7.1	1370	17.4	0.0126582	0.0926	2.57769	0.307	10.7956	0.0239	10.1133	0.971703	1479	48.8689	272	29.364	152	15.3722	89.7228	144	14.451		2890	3.8	3	840	2.24	0.018	2.1	0.041	1.16	1.4	0.9	6.9	2.77	62	28.3	187	49.8	800	148	11640
69	Braden_039_c	17.361	126.8	234.8	177.1	0.762195	0.11268	1.2264	4.686	2.27969	0.2997	2.36278	0.861024	1842	22.1951	1763	40.1909	1689	39.9073	8.30619	1672.62	38.5455		2070	5.6	2	1184	1.42	0.0068	8.7	0.146	4	9.2	1.74	40.7	11.4	115	40.7	181	35.7	321	61	10050
70	Braden_040_c	13.323	89.6	435	140.7	0.332779	0.12551	1.12251	2.779	2.74361	0.1591	3.01468	0.928272	2035.7	19.8574	1348	36.9839	952	28.6998	53.2348	891.416	25.9216		1100	17.7	3.1	1058	1.99	0.036	10.4	0.148	1.82	4.22	1.64	22.8	7.73	95.7	36.3	167	36.5	350	62.3	10540
71	Braden_041_r	6.866	11	762	13.6	0.0163934	0.1115	3.03918	0.436	10.5977	0.0282	8.9461	0.965674	1820	55.1302	366	38.7877	179	16.0135	90.1648	165.491	14.6798		1410	5.6	2.5	729	2.04	0.015	0.49	0.062	0.29	0.92	0.59	9.3	2.92	47.7	19.5	146	43	623	116	13900
72	Braden_041_c	17.517	57.3	271	75.8	0.282486	0.1117	1.13514	4.011	1.96829	0.2583	2.08368	0.844534	1826.9	20.583	1635	32.1816	1481	30.8593	18.9337	1449.41	29.2361		3570	7.8	2.3	1796	1.27	0.0135	1.34	0.067	1.79	5.81	0.54	39.9	14.9	161.2	60	245	47	430	76.1	11840
73	Braden_042_r	2.1603	85	2240	206	0.0922509	0.0949	2.1442	0.775	4.12311	0.0589	3.76189	0.855998	1526	40.3996	582	23.9965	369	13.8814	75.8191	350.511	12.9741		8380	9.6	2.5	4300	3.83	0.128	5.7	0.48	5.8	10.7	3.21	60.4	27	355	141	685	137	1510	230	13900
74	Braden_042_m	11.339	143.8	1621	378.3	0.236967	0.10498	1.12022	1.788	2.76022	0.1236	2.49237	0.91401	1713.8	20.5997	1040	28.7063	751	18.7177	56.1793	715.264	17.2851		5360	19.3	5.2	2930	2.38	0.298	17.7	1.67	15.4	18.8	19.3	66.6	25.7	258.8	95.7	446	93.6	887	144.1	12530
75	Braden_042_c	8.3114	96	345	163.4	0.478469	0.11072	1.2887	4.15	2.83297	0.2684	2.57008	0.890699	1811	23.4132	1663	47.1122	1533	39.3993	15.3506	1505.99	37.5089		3540	11.7	1.8	1934	1.36	0.098	6.5	0.5	4.73	6.05	2.89	41.9	15.4	179.5	65.8	295	57.8	487	89.5	11310
76	Braden_043_r	17.756	0.095	1380	1.66	0.00526316	0.0527	6.1539	0.00891	7.14107	0.001246	3.50251	0.507603	290	139.95	9	0.642696	8.03	0.281252	97.231	7.96117	0.280661		2300	2.2	4.2	584	1.43	0.018	0.23	0.041	0.77	0.12	0.14	0.59	0.98	18.8	13.7	147	50	737	151	13700
77	Braden_043_c	4.5335	61.3	139.8	82.6	0.59988	0.1128	2.27102	3.94	3.69133	0.2502	4.0202	0.829871	1844	41.0908	1620	59.7996	1439	57.8507	21.9631	1403.58	54.5814		770	8.7	2.8	607	1.77	0.0034	4.03	0.024	0.89	3	0.34	15	4.56	53	19.5	92.3	18.8	179	35.1	10840
78	Braden_044_r	1.0497	4.39	1440	29.9	0.0211864	0.1004	2.68334	0.0959	5.61633	0.0069	6.34637	0.906471	1631	49.8652	93	5.22319	44.3	2.81144	97.2839	41.3381	2.62125		3220	14.3	3.1	1131	2.38	0.07	3.9	0.202	2.54	2.7	2.8	12.1	6.8	74	38.1	240	60.4	934	167	14900
79	Braden_044_c	15.808	73.31	202.4	103.2	0.517331	0.11291	1.14513	4.597	1.78553	0.2936	1.91987	0.811365	1846	20.715	1748	31.211	1659	31.8507	10.13	1639.04	30.6708		1570	12.3	1.7	863	1.92	0.0055	3.33	0.074	1.23	3.67	0.37	19.6	6.6	75	28.4	129.4	26	238	43.8	9870
80	Braden_045_r	6.6948	1.26	754	151	0.178571	0.1	10.0499	0.0207	11.6372	0.00157	9.62921	0.56733	1580	186.939	20.8	2.42055	10.09	0.971587	99.3614	9.42507	0.916107		2040	5.6	1.1	1110	1.5	0.09	5.2	0.62	13.4	21.5	6.4	62	15.9	101	33.3	200	55.3	850	148	14000
81	Braden_045_c	13.458	43.5	690	99.1	0.148148	0.137	1.32937	1.261	4.08926	0.0661	3.96795	0.945997	2188	23.1152	826	33.7773	413	16.3876	81.1243	371.507	14.4548		3510	6	2.6	2140	1.93	0.112	16.1	1.9	33.5	70	10.6	204	49.3	366	79.3	266	46.5	480	76.3	10930
82	Braden_046_r	5.8978	55.9	500	98.8	0.197239	0.1351	1.33752	1.895	3.47168	0.1023	3.62565	0.929879	2165	23.3192	1079	37.4594	628	22.7691	70.9931	572.218	20.1781		2990	5.9	3	2270	2.58	0.111	15.1	0.68	11.4	33.6	3.92	162	41.4	336	79.2	267	46	477	79.7	11310
83	Braden_046_c	7.4918	82.2	370	116.1	0.312012	0.13585	1.15679	3.359	2.83203	0.1796	2.57903	0.912775	2175	20.1469	1499	42.4521	1065	27.4667	51.0345	990.096	24.6169		1130	5.3	2.2	1119	2.99	0.006	14.28	0.048	0.76	3.61	0.72	17.5	6.36	80.7	36.5	193	47.3	468	98.1	11850
84	Braden_047_r	4.8877	0.492	829	6.5	0.0108696	0.0741	10.9768	0.0142	7.1129	0.001441	5.40891	-0.528175	1010	221.433	14.3	1.01714	9.28	0.501947	99.0812	8.95516	0.493464		1670	3.3	1.3	883	1.93	0.0063	0.26	0.016	0.47	0.85	0.36	2.1	1.44	36.3	25.3	192	63.2	905	169	13320
85	Braden_047_c	24.78	51.1	109.9	56.1	0.512033	0.11395	1.18761	5.328	1.592	0.339	1.62211	0.727096	1864	21.4403	1873	29.8182	1882	30.5282	-0.965665	1884.34	30.2339		1660	10.5	2.9	699	1.45	0.006	2	0.017	1.57	2.81	0.165	15.5	5.36	59	24.1	107.9	23.9	215	41.1	9820
86	Braden_048_r	18.716	37.7	1878	127.2	0.0657895	0.10383	1.2336	1.364	1.89775	0.0947	1.74519	0.773774	1695	22.7429	873.2	16.5712	583.4	10.1814	65.5811	552.337	9.42071		2950	17.6	1.5	1530	3.86	0.103	7.82	0.508	4.68	7.4	7.4	22.8	9.1	109.7	48.8	268	77	932	179.4	16490
87	Braden_048_m	6.5354	105.6	974	397	0.409668	0.1065	1.50652	1.458	2.41186	0.0987	2.1831	0.789448	1740	27.6118	913	22.0203	607	13.2514	65.1149	573.207	12.219		1500	18.3	2.7	1741	2.73	0.064	8.5	0.235	4	7.5	3.76	36.8	11.91	140.9	58.6	291	59.8	618	118.4	12120
88	Braden_048_c	3.188	89.6	450	236	0.510204	0.1215	1.40551	3	4.44722	0.1801	4.06776	0.94938	1978	25.0302	1408	62.6169	1067	43.403	46.0566	1010.41	39.5842		910	9.2	1.9	1159	1.98	0.027	5.99	0.138	1.93	4.7	2.17	25.9	8.57	104	39.8	175	35.9	340	65.6	11130
89	Braden_049_r	11.108	0.056	1406	2.2	0.00243902	0.0524	5.43628	0.00924	5.29018	0.001246	2.98094	0.232055	340	123.917	9.34	0.494103	8.03	0.239369	97.6382	7.96422	0.239063		1960	2.6	1.3	932	2.11	0.0092	0.3	bdl	bdl	0.23	bdl	1.62	1.58	36.9	24.9	210	66.4	1119	211	13610
90	Braden_049_c	4.1444	127	217	146	0.671141	0.1644	1.5748	8.85	1.777	0.3896	1.97267	0.651729	2501	26.5047	2323	41.2798	2121	41.8404	15.1939	2042.32	41.0577		7830	8.3	1.6	528	1.75	10.4	111	6.3	37	7.6	0.89	13.5	4.27	39.2	18.5	79.8	17	151	29.8	11590
91	Braden_050_r	0.99869	0.89	680	9.3	0.0128205	0.0716	1.8331	0.0224	9.87221	0.00226	11.5668	0.997861	975	37.3721	22.4	2.21137	14.6	1.68876	98.5026	14.0873	1.62833		1950	8.1	2.7	1430	2.02	0.0235	2.12	0.109	1.73	3.6	2.36	16.9	8.3	119	51	272	63.4	741	143	14590
92	Braden_050_c	9.212	31.51	378	40.3	0.107066	0.11544	1.13922	4.21	2.79765	0.2638	2.67271	0.914259	1886.7	20.509	1676	46.8887	1509	40.3312	20.0191	1472.95	38.0998		2940	7	1.7	1531	1.27	0.0184	1.62	0.037	0.7	2.77	1.37	17.5	8.9	129.2	46	230	48.6	466	80.8	12480
93	Braden_051_r	2.3571	0.217	1190	4.4	0.00243902	0.0598	6.26758	0.01034	7.32199	0.001256	6.55974	0.597114	590	135.781	10.45	0.765148	8.09	0.530683	98.6288	7.95234	0.522835		2450	3.8	1.6	1050	2.09	0.0065	1.38	0.087	1.01	2.7	1.19	8.1	3.69	70	33.1	213	65.2	861	162	13330
94	Braden_051_c	6.389	73.7	332	109.9	0.329056	0.11301	1.25129	4.231	1.85293	0.2721	1.81357	0.767265	1848	22.6309	1680	31.1292	1551	28.1285	16.0714	1522.12	26.8216		4040	9.8	2.6	1610	1.66	0.0057	2.55	0.1	1.07	2.91	1.09	22.5	10.7	130.6	51.2	277	59.3	557	107.7	12730
95	Braden_052_r	15.304	1.13	1148	9.4	0.00729927	0.0745	10.6511	0.014	14.3207	0.001346	3.48224	1.04037	970	214.511	14.1	2.01921	8.67	0.30191	99.1062	8.36064	0.303742		2500	1	2.3	778	1.98	12.2	126	6.7	38	10.7	1.57	7.7	1.58	30.8	18.6	157	60.1	950	188	14200
96	Braden_052_c	11.478	37	396	92.5	0.233645	0.1296	1.20014	3.096	1.81785	0.1729	1.62714	0.762675	2092	21.0947	1431	26.0135	1028	16.727	50.8604	961.586	15.1597		1960	7.6	1.2	603	2.88	29.5	283	17.7	97	23.7	5.2	27.6	5.77	54.6	19.8	98.1	23.25	239.8	46	11170
97	Braden_053_c	22.353	64.09	276.3	88	0.322685	0.1141	1.08488	4.911	1.59463	0.312	1.66474	0.779243	1865.5	19.5802	1804	28.7671	1750	29.133	6.19137	1736.77	28.3288		5270	7.8	1.5	2142	1.56	0.0064	2.37	0.043	0.77	3.41	0.194	27	11.32	164.3	68.9	335.6	73	727	132.1	12290
98	Braden_054_r	2.0651	15.5	1040	36.6	0.0348432	0.1063	4.53312	0.221	14.0627	0.015	10.0717	0.983687	1734	83.1199	203	28.5474	96.3	9.69909	94.4464	88.9544	8.92981		1750	7.3	1.6	909	2.45	0.081	6.8	0.224	2.23	3.3	2.2	12.2	3.37	51.5	24.8	175	55.8	830	181	13130
99	Braden_054_c	12.687	120.4	271.2	181.8	0.672495	0.11384	1.13869	4.279	1.83822	0.2709	1.98986	0.825903	1861.4	20.5616	1689	31.0475	1545	30.7433	16.998	1514.17	29.231		1470	6.8	1.4	1299	2.03	0.0232	10.63	0.178	2.72	5.61	1.62	33.3	10.73	119	44.7	203.3	38.8	369	68.4	9800
100	Braden_055_r	1.1801	39.7	1580	36.7	0.0232558	0.1291	3.92503	0.85	25.9017	0.048	22.9481	0.994379	2084	69.0425	620	160.59	299	68.6147	85.6526	273.747	61.8523		1350	10.4	2.7	670	2.19	0.0294	3.75	0.105	1.53	2.6	1.16	10.7	3.46	47.3	16.8	113	33.4	417	72	12600
101	Braden_055_c	13.14	34.1	75.6	45.5	0.604961	0.1608	1.1776	7.73	2.06886	0.3485	2.0986	0.840401	2467	19.8939	2202	45.5563	1927	40.44	21.8889	1834.97	38.2416		1060	2.7	1.7	452	1.19	0.0076	4.32	0.052	0.79	1.38	0.67	7.5	2.72	33.4	13.72	74.4	17.1	186	41.8	8100
102	Braden_056_r	3.3632	7.13	878	12.1	0.0142653	0.1101	1.99451	0.247	6.55447	0.0163	7.45912	0.967686	1800	36.2818	224	14.682	104.1	7.76495	94.2167	96.1335	7.13479		1720	9	6	1240	1.91	0.0015	0.88	0.046	0.53	1.61	0.41	6	4.8	65	39.7	262	73.6	993	192	15100
103	Braden_057_c	15.254	65.8	213.2	84.9	0.396511	0.1132	1.25585	4.405	1.5471	0.2794	1.81377	0.731644	1853	22.7052	1712.8	26.4988	1588	28.8026	14.3011	1561.41	27.5533		3730	11	2.5	1755	1.65	0.0116	3.63	0.092	2.13	5.19	0.453	32.4	11.9	156	60.6	283	61	544	104.8	11460
104	Braden_058_r	2.1241	0.939	568	38	0.00909091	0.111	13.5505	0.0421	13.813	0.00275	10.2523	0.396472	1800	246.048	41.9	5.78763	17.7	1.81466	99.0167	16.2572	1.69872		1510	3.5	2.3	621	1.57	0.0111	0.5	0.043	bdl	0.25	0.25	2.2	1.15	25.7	15.1	142	50.1	722	143	15000
105	Braden_058_m	8.3785	12.5	573	27.3	0.0440529	0.12182	1.23362	2.024	3.8381	0.1206	3.91956	0.94964	1983	21.9571	1122	43.0634	734	28.7695	62.9854	683.753	25.9663		1460	7.9	1.5	663	1.62	0.052	7.11	0.223	1.66	2.37	1.09	11.8	3.33	42.6	21.7	111.7	29.7	341	68.7	11680
106	Braden_058_c	12.745	104	758	386.4	0.507099	0.11587	1.11445	1.979	1.94437	0.1238	2.01243	0.841887	1893.3	20.0469	1108	21.5437	752	15.1335	60.281	706.73	13.8065		1670	17	3	1447	2.92	0.139	25.2	0.54	6.2	7.6	4.13	37.9	13.2	135.9	47.9	201	49.9	482	85.2	11040
107	Braden_059_r	1.7701	7.29	1060	38.7	0.035461	0.0894	5.13193	0.302	15.2646	0.0245	13.5227	0.943555	1410	98.1815	268	40.9091	156	21.0955	88.9362	148.213	19.8947		2090	16.2	5.5	1090	2.56	0.157	7.8	0.384	5.1	5	6	11.1	5.6	79	37.4	195	58.2	718	151	13600
108	Braden_059_c	14.992	7.2	522	31.5	0.0586854	0.10763	1.16821	2.263	2.1082	0.152	2.2539	0.85863	1759	21.3597	1200	25.2985	912	20.5556	48.1524	871.692	18.9915		3130	14.8	2.5	1335	2.09	0.034	2.39	0.116	1.53	2.15	1.22	12	6.41	93.1	44.9	260	65.9	791	158.9	13470
109	Braden_060_r	1.5931	43.4	2230	72.2	0.0322581	0.1001	6.37266	0.126	27.7958	0.009	22.2546	0.991993	1620	118.51	120	33.3549	58	12.9077	96.4198	53.9097	11.9672		3710	13.2	4.9	1970	1.89	0.031	4.09	0.114	1.77	5.7	2.15	36	13.1	161	67.3	365	79	1040	166	13080
110	Braden_060_c	26.986	75.24	160.8	94	0.581395	0.11388	1.11052	5.083	1.37541	0.3236	1.5164	0.709115	1861.7	20.0513	1833.9	25.2236	1807	27.4013	2.93817	1800.37	26.8658		4210	11.8	2	1760	1.5	0.0028	4.87	0.06	1.44	3.46	0.158	32.8	12.65	147.7	57.8	271	55.3	542	98.2	11850
111	Braden_061_r	2.9193	19.3	909	46.8	0.05	0.1183	4.09687	1.04	10.6241	0.0638	10.2585	0.923612	1928	73.3694	722	76.7059	398	40.8289	79.3568	367.834	37.0448		1380	10	7.2	840	1.74	0.042	4.2	0.28	1.7	4.8	2.4	9.6	3.8	59	23.6	157	46	540	112	13800
112	Braden_061_c	16.15	21.09	401.2	69	0.170358	0.11905	1.20481	2.993	1.8057	0.182	1.99473	0.803459	1941	21.5477	1407	25.4061	1078	21.5032	44.4616	1023.79	19.7206		1230	10.8	1.3	357	1.47	0.028	2.14	0.129	1.35	2.25	1.37	9.5	3.19	32.8	10.79	55.9	11.24	109.8	21.9	13380
113	Braden_062_r	2.2879	22.7	1591	49.5	0.0309598	0.1034	1.68322	0.53	14.3744	0.0371	13.7989	0.993693	1686	31.0623	430	61.8101	235	32.4274	86.0617	219.585	29.9259		6660	9.3	1.6	2480	2.39	0.051	2.02	0.141	2.29	5.1	1.19	27.5	13.7	181	72.4	432	117	1300	238	13500
114	Braden_062_c	15.342	54.82	255.2	83.8	0.322789	0.11387	1.12225	4.881	1.33271	0.3106	1.46312	0.681412	1861.8	20.2635	1798.7	23.9714	1744	25.5168	6.32721	1729.61	24.8213		6590	9.7	1.9	3082	1.45	0.0107	1.92	0.055	1.08	4.8	0.43	40.8	18	236.2	101.8	488	103.4	994	183.7	12370
run order	Sample_Grain_position (r = rim, m = mantle, c = core)	laser parameters	Duration(s)	Comments	Approx_Pb_PPM	Approx_U_PPM	Approx_Th_PPM	Th/U	Final207_206	2 se %	Final207_235	2 se %	Final206_238	2 se %	Rho	FinalAge207_206		FinalAge207_235		FinalAge206_238
secondary standard
GJ1_1		3Hz_225shots_3mJ_25um			2.71	251.2	9.06	0.0283286	0.06033	1.18184	0.8134	1.31133	0.0981	1.30777	0.592775	617	25.5217	604	7.92046	603.2	7.88849
GJ1_2		3Hz_225shots_3mJ_25um			2.589	245.1	9.2	0.0352113	0.06034	1.20901	0.8278	1.33329	0.09986	1.31621	0.583621	616	26.1069	612.1	8.16108	613.6	8.07629
GJ1_3		3Hz_225shots_3mJ_25um			2.727	254	9.93	0.0318471	0.05968	1.18551	0.8167	1.28572	0.0994	1.32998	0.589624	592	25.7017	606.2	7.79403	610.8	8.12349
GJ1_4		3Hz_225shots_3mJ_25um			2.738	251	9.61	0.0289855	0.06022	1.2788	0.8113	1.43945	0.09777	1.37186	0.587088	607	27.6339	602.7	8.67554	601.3	8.24898
GJ1_5		3Hz_225shots_3mJ_25um			2.844	263.1	10.25	0.0340136	0.05998	1.22079	0.8122	1.40363	0.09808	1.3962	0.61978	604	26.4185	603.3	8.46811	603.1	8.42048
GJ1_6		3Hz_225shots_3mJ_25um			2.623	242.6	9.89	0.0373134	0.05987	1.18442	0.8097	1.42324	0.09867	1.42593	0.654375	598	25.6485	602.2	8.57073	606.5	8.64827
GJ1_7		3Hz_225shots_3mJ_25um			2.587	238.8	8.87	0.0304878	0.06013	1.18295	0.8146	1.38451	0.09866	1.45398	0.65362	609	25.5765	605.1	8.37764	606.9	8.82417
GJ1_8		3Hz_225shots_3mJ_25um			2.882	267.8	10.28	0.0352113	0.05999	1.15775	0.8098	1.52279	0.09784	1.50581	0.707788	603	25.0528	602.2	9.17025	601.6	9.05895
GJ1_9		3Hz_225shots_3mJ_25um			2.915	266.7	10.36	0.0342466	0.06065	1.1714	0.8222	1.43832	0.09934	1.46222	0.673916	629	25.2482	609.7	8.76944	610.5	8.92685
GJ1_10		3Hz_225shots_3mJ_25um			2.803	263.2	9.86	0.0331126	0.05988	1.1755	0.8052	1.52775	0.09788	1.49944	0.698571	600	25.4538	599.2	9.15425	601.9	9.02511
GJ1_11		3Hz_225shots_3mJ_25um			2.759	252.5	9.99	0.0381679	0.05999	1.14944	0.8093	1.57046	0.09757	1.5518	0.729	602	24.873	601.4	9.44473	600.6	9.3201
GJ1_12		3Hz_225shots_3mJ_25um			2.746	256.3	10.31	0.0377358	0.05955	1.18625	0.8048	1.45447	0.09695	1.52349	0.683548	588	25.7383	599	8.71227	596.4	9.0861
GJ1_13		3Hz_225shots_3mJ_25um			2.82	261.8	9.52	0.0327869	0.05925	1.18799	0.8131	1.54725	0.0987	1.70827	0.737922	576	25.8237	604.6	9.35466	606.9	10.3675
GJ1_14		3Hz_225shots_3mJ_25um			2.755	260.6	9.62	0.0297619	0.06004	1.16598	0.8022	1.36049	0.09706	1.42172	0.649532	605	25.2233	597.7	8.13166	597.1	8.48907
GJ1_15		3Hz_225shots_3mJ_25um			2.878	260.5	9.65	0.0326797	0.06037	1.13965	0.8159	1.42649	0.09774	1.45256	0.686755	617	24.6048	605.3	8.63452	601.1	8.73136
GJ1_16		3Hz_225shots_3mJ_25um			2.712	252.3	10.14	0.0371747	0.05997	1.16634	0.8044	1.28567	0.09733	1.36344	0.613703	602	25.2418	599.4	7.70632	598.7	8.16293
